# Supplementary material
Source: PubMed Central journal article supplement (PMC8269250)

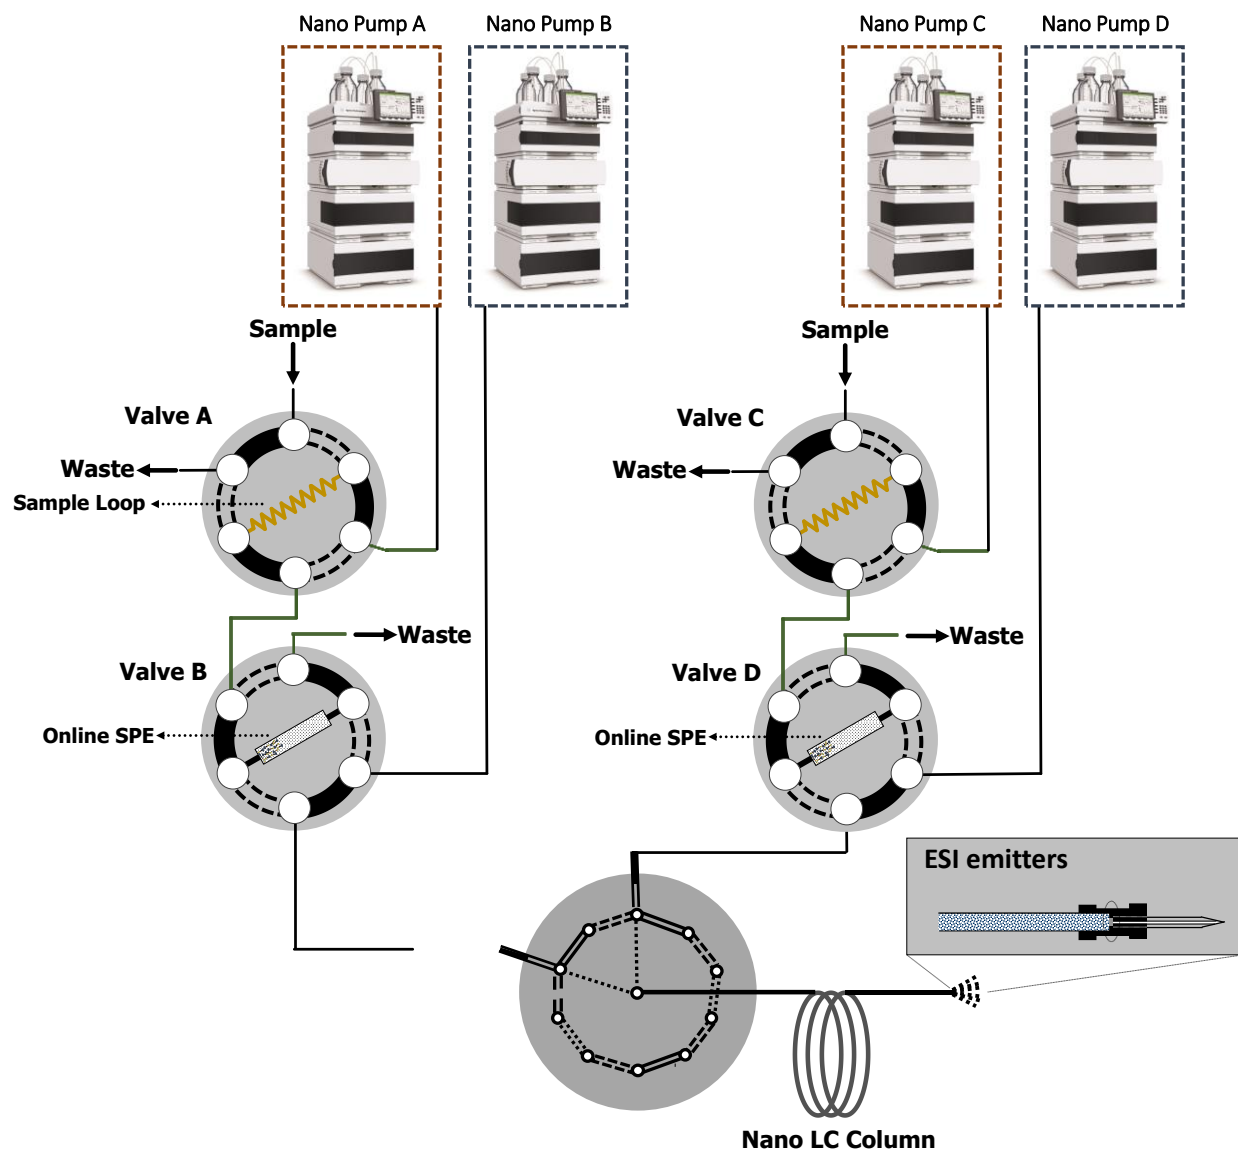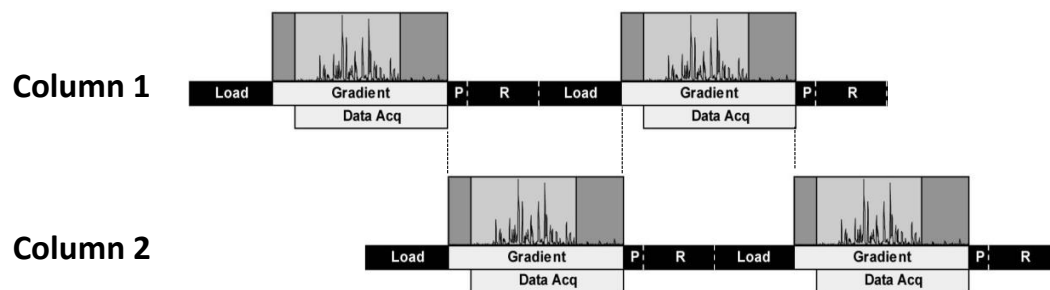

Supplement: msystems.01058-20-sf001.pdf [file msystems.01058-20-sf001.pdf]
